# Supplementary material for: Combining H-FABP and GFAP increases the capacity to differentiate between CT-positive and CT-negative patients with mild traumatic brain injury
Source: PLoS One. 2018 Jul 9;13(7):e0200394. doi: 10.1371/journal.pone.0200394 (PMC6037378; doi:10.1371/journal.pone.0200394)
Supplement: S1 Dataset — (XLSX) [file pone.0200394.s006.xlsx]

## Sheet: Feuil1
Patient	Origin	Gender	Age	GCS	Trauma to blood sample (min)	CT-scan result	Subarachnoid haemorrhage	Epidural haemorrhage	Subdural haemorrhage	Intracerebral haemorrhage	Contusion with haemorrhage	Skull fracture	Isolated TBI	Loss of consciousness	Nausea and vomiting	Headache	Amnesia	Injury type	CRP pg/ml	dj1 pg/ml	GSTP pg/ml	HFABP pg/ml	ICAM pg/ml	Il-10 pg/ml	MMP1 pg/ml	MMP3 pg/ml	MMP9 pg/ml	NDKA ng/ml	PRDX1 ng/ml	SAA pg/ml	VCAM pg/ml
1	Geneva	man	36	15	120	0	No	No	No	No	No	No	ISOLATED TBI	yes	yes	yes	no	Assault	8.41787e+06	753511	308873	1073	426432	0.18614	105533	10485.4	459413	31	121	1.03358e+06	758710
2	Geneva	woman	22	15	60	0	No	No	No	No	No	No	ISOLATED TBI	yes	yes	no	no	Assault	8.42204e+06	43848.4	28199.5	1834	259139	0.192584	7215	7298.7	523134	8	22	2.55492e+06	291736
3	Geneva	man	70	15	180	0	No	No	No	No	No	No	ISOLATED TBI	yes	no	no	no	Fall	3.223e+06	144394	60490.6	1491	426330	0.0427918	19404	32157	197456	5	26	2.00857e+06	404283
4	Geneva	man	81	15	150	1	Yes	No	No	No	No	No	ISOLATED TBI	yes	no	no	yes	Fall	2.98276e+07	172489	43005.1	7418	527415	0.397134	25518	190815	110947	11	67	5.42536e+07	1.10959e+06
5	Geneva	man	27	15	200	0	No	No	No	No	No	No	ISOLATED TBI		no	no	yes	Fall	3.34247e+06	33983.5	23273	1620	430233	0.0427918	19534	31372	54359.8	26	58	1.07024e+06	335083
6	Geneva	woman	55	15	40	0	No	No	No	No	No	No	ISOLATED TBI	yes	no	no	yes	Fall	2.65604e+06	1.7729e+06	182189	1275	280165	0.116591	5042	9342.3	52585.4	109	516	4.08739e+06	358357
7	Geneva	woman	58	15	180	0	No	No	No	No	No	No	ISOLATED TBI	yes	no	no	yes	Fall	1.35483e+07	427465	1.10475e+06	2054	324158	0.0523839	50763	13852.1	119921	75	226	2.02416e+07	479892
8	Geneva	man	82	15	180	0	No	No	No	No	No	No	ISOLATED TBI	yes	no	no	yes	Fall	1.45193e+06	6.34153e+06	684760	7611	359325	1.11387	36257	22323.8	372668	247	664	2.22676e+06	1.03437e+06
9	Geneva	man	62	15	160	0	No	No	No	No	No	No	ISOLATED TBI	no	no	no	yes	Fall	4.54163e+06	124020	151584	2897	351458	0.108357	53289	18144.1	171894	14	70	1.42584e+06	392216
10	Geneva	man	28	15	360	0	No	No	No	No	No	No	POLITRAUMA	yes	no	no	yes	Assault	3.02072e+06	272265	367198	2798	342703	0.0485281	55237	17492.7	209834	10	65	911246	316366
11	Geneva	woman	88	15	105	1	Yes	No	No	No	No	No	ISOLATED TBI	yes	no	yes	yes	Traffic	603308	176439	122812	17775	347732	1.88406	27330	7994.7	58208.7	8	84	467813	685012
12	Geneva	man	76	15	255	0	No	No	No	No	No	No	ISOLATED TBI	yes	no	no	yes	NA	970275	127676	67193.5	3790	286384	0.18614	11152	39034.1	88149.1	9	37	1.43762e+06	450035
13	Geneva	woman	74	15	220	1	No	No	No	Yes	No	No	ISOLATED TBI	yes	no	no	no	Fall	2.37435e+07	111262	208240	20203	1.05407e+06	0.897192	152336	13010.3	486841	11	59	7.70182e+06	840934
14	Geneva	man	20	15	240	0	No	No	No	No	No	No	ISOLATED TBI	yes	yes	yes	yes	Sport	1.568e+06	95177	142047	1892	358215	0.0640861	9284	12789.8	173646	11	71	1.04897e+06	452388
15	Geneva	man	68	15	180	0	No	No	No	No	No	No	ISOLATED TBI		no	no	yes	NA	1.08054e+06	136379	161993	7304	273861	0.0523839	50429	17542.8	163978	7	34	150780	389420
16	Geneva	woman	95	15	270	0	No	No	No	No	No	No	ISOLATED TBI	yes	no	no	yes	NA	980316	481060	384877	6554	358114	0.143669	20594	11610.9	322795	31	135	1.01452e+06	701070
17	Geneva	man	62	15	160	1	No	No	Yes	No	No	No	ISOLATED TBI	yes	no	no	no	Fall	700845	447557	148585	2415	333268	0.420011	14605	15486.8	147441	17	100	364126	558725
18	Geneva	woman	65	15	300	0	No	No	No	No	No	No	ISOLATED TBI	yes	no	no	no	Fall	561946	26760	59252.9	4224	341397	0.521829	14190	13154	161433	6	28	1.79289e+06	532249
19	Geneva	man	34	15	40	1	No	No	No	No	Yes	No	POLITRAUMA	yes	no	no	yes	Traffic	1.85654e+06	2.80547e+06	163248	2787	405949	0.675211	13773	23530.7	107859	9	47	2.18457e+06	532249
20	Geneva	woman	91	15	150	1	No	No	No	No	No	Yes	POLITRAUMA	yes	no	yes	no	Traffic	1.45208e+07	56558.9	82253.4	4963	621220	0.505512	24689	13281.8	388468	4	24	2.7938e+06	976350
21	Geneva	man	25	15	225	1	No	No	No	Yes	Yes	No	ISOLATED TBI	yes	no	yes	yes	Assault	144329	499834	830594	2058	247125	0.0640861	20643	10655.1	409002	23	88	281713	359977
22	Geneva	man	71	15	120	0	No	No	No	No	No	No	ISOLATED TBI	yes	no	no	yes	Fall	1.4386e+07	637390	555268	3302	660263	0.0700057	62819	79065.8	365255	31	122	3.54698e+06	664392
23	Geneva	man	56	15	180	0	No	No	No	No	No	No	ISOLATED TBI	yes	no	no	no	Fall	7.07491e+06	5.14014e+06	767068	1981	496367	0.0680278	21212	15573.9	457154	35	169	1.14067e+06	676174
24	Geneva	woman	19	15	90	0	No	No	No	No	No	No	ISOLATED TBI	yes	yes	no	no	Fall	1.84989e+06	1.12014e+06	642332	1614	559598	0.0680278	2707	7970.1	211416	132	467	1.40082e+06	611544
25	Geneva	man	27	15	300	0	No	No	No	No	No	No	POLITRAUMA	yes	no	yes	yes	Fall	526662	111410	129637	806	330562	0.104259	24786	10891.5	112750	6	36	257906	530484
26	Geneva	woman	49	15	316	0	No	No	No	No	No	No	ISOLATED TBI	yes	no	no	yes	Fall	356599	350083	469665	2272	436916	0.0759667	70484	6328.2	175201	16	98	384404	549017
27	Geneva	man	67	15	330	0	No	No	No	No	No	No		yes	no	no	no	Fall	2.46967e+07	608354	269951	28339	438975	0.0759667	17556	47796.8	372475	10	79	3.22772e+06	434737
28	Geneva	man	56	15	45	0	No	No	No	No	No	No	ISOLATED TBI	yes	no	no	no	Fall	2.02151e+06	73116.5	72000.5	2166	343407	0.351708	6947	31187.9	37960.6	5	23	2.55566e+06	726419
29	Geneva	woman	35	15	230	0	No	No	No	No	No	No	ISOLATED TBI	yes	no	no	no	Traffic	1.78936e+06	37602	117122	4471	422430	0.126951	3493	9198.2	88260.1	5	32	1.04897e+06	367928
30	Geneva	man	22	15	260	0	No	No	No	No	No	No	POLITRAUMA	yes	no	yes	yes	Assault	56422.7	614391	509829	13061	342703	0.0700057	18149	29929.7	458201	22	93	276661	470332
31	Geneva	woman	87	15	90	1	Yes	No	No	No	No	No	ISOLATED TBI	yes	no	no	yes	Fall	1.01623e+07	351802	338644	7965	470796	0.233793	6183	18714.9	189169	36	201	8.20665e+06	601390
32	Geneva	woman	79	15	360	1	No	No	No	Yes	Yes	No	ISOLATED TBI	yes	no	no	no	Fall	3.11884e+06	1.18701e+07	536142	3948	328259	0.0900213	19339	19142.4	198703	48	457	985207	689873
33	Geneva	man	55	15	175	0	No	No	No	No	No	No	ISOLATED TBI	yes	no	no	no	Fall	3.57479e+06	100757	67818.7	2928	321659	0.0390018	6859	33523.1	48466.3	5	21	6.34119e+07	309436
34	Geneva	man	32	15	240	0	No	No	No	No	No	No	ISOLATED TBI	yes	no	no	yes	Assault	1.44087e+06	382004	255242	3341	404825	0.0640861	10052	8806.1	327121	9	38	648988	450918
35	Geneva	man	23	15	240	0	No	No	No	No	No	No	POLITRAUMA	yes	no	no	no	Assault	889477	372109	465051	2962	343809	0.0296637	14632	6524.1	177366	16	69	913442	542103
36	Geneva	man	41	15	294	0	No	No	No	No	No	No	ISOLATED TBI	no	no	yes	no	Others	3.48317e+06	66821.9	170589	3410	463752	0.098136	14358	11480.6	139003	6	49	2.77005e+06	349226
37	Geneva	man	24	15	60	1	No	No	No	No	No	Yes	POLITRAUMA	yes	no	no	yes	Traffic	193267	490021	1.25958e+06	4569	346008	0.503711	10072	24107.8	199066	35	215	594931	506356
38	Geneva	woman	91	15	210	0	No	No	No	No	No	No	ISOLATED TBI	yes	no	yes	no	Fall	242962	28765.8	41143.7	617	497106	0.001	13482	4184.6	188580	7	29	522198	693493
39	Geneva	woman	81	15	360	1	Yes	No	No	No	No	Yes	ISOLATED TBI	yes	yes	no	no	Fall	6.99805e+06	135583	152246	2237	429954	5.36036	9511	10298	349094	9	45	1.16153e+07	648930
40	Geneva	man	69	15	75	0	No	No	No	No	No	No	POLITRAUMA	yes	no	no	yes	Fall	8.42868e+06	382594	241595	5053	549306	0.130821	47809	28718.1	36277	61	355	1.94124e+06	661904
41	Geneva	man	41	15	225	0	No	No	No	No	No	No	ISOLATED TBI	yes	no	yes	yes	Fall	478380	121577	93859.4	1594	430930	0.145122	16156	47721.9	76927.8	7	37	700506	620567
42	Geneva	man	31	15	210	0	No	No	No	No	No	No	ISOLATED TBI	yes	no	no	yes	Traffic	1.77949e+06	291553	487595	1344	447316	0.403429	39196	28635.9	334936	28	169	655224	716644
43	Geneva	man	90	15	240	0	No	No	No	No	No	No	ISOLATED TBI	yes	no	no	no	Fall	1.18455e+08	1.25895e+06	560915	12505	782846	0.555655	20690	30064.5	1.68551e+06	84	734	5.1391e+08	1.76737e+06
44	Geneva	man	30	15	45	0	No	No	No	No	No	No	ISOLATED TBI	yes	no	no	no	Sport	1.91949e+06	1.89962e+06	635458	2726	508049	0.252382	24105	27858.9	570395	39	364	656689	574216
45	Geneva	woman	40	15	175	0	No	No	No	No	No	No	ISOLATED TBI	yes	no	no	yes	Traffic	298572	21047.5	106642	2777	402662	0.360598	5313	7568.7	203904	13	98	149009	709223
46	Geneva	man	58	15	60	0	No	No	No	No	No	No	ISOLATED TBI	yes	no	no	yes	Fall	1.04071e+06	44995	37660.2	1829	419814	0.03654	15776	24684.5	143004	13	72	2.85206e+06	463018
47	Geneva	woman	82	15	200	0	No	No	No	No	No	No	ISOLATED TBI	yes	no	no	yes	Fall	548891	1.6939e+06	926556	8606	615868	0.130821	50387	27362.7	408825	201	973	796129	1.09134e+06
48	Geneva	man	75	15	120	1	Yes	No	Yes	No	No	Yes	POLITRAUMA	yes	yes	no	yes	Traffic	2.63255e+06	3.10514e+07	4.82234e+06	2046	273369	1.9496	5711	10719.7	218032	517	973	3.30311e+06	538348
49	Geneva	man	27	15	170	0	No	No	No	No	No	No	POLITRAUMA	yes	no	no	yes	Traffic	120444	6.26398e+07	490192	3886	443024	0.190974	32259	18971.2	309060	177	973	1.26346e+06	747660
50	Geneva	man	18	15	60	0	No	No	No	No	No	No	ISOLATED TBI	yes	no	yes	no	Sport	5.35003e+06	36754.2	158184	3155	600002	0.798285	55298	16218.6	250075	14	97	1.14227e+06	793479
51	Geneva	man	34	15	195	0	No	No	No	No	No	No	ISOLATED TBI	yes	no	no	yes	Traffic	361341	8.5468e+06	34663.3	2066	422739	0.152307	13459	12311.2	574802	14	71	1.01719e+06	753902
52	Geneva	man	60	15	120	0	No	No	No	No	No	No	ISOLATED TBI	yes	no	yes	yes	Assault	1.57657e+07	2.85731e+07	133656	3201	656045	0.154707	21442	26199.7	477415	42	281	5.95207e+06	787276
53	Geneva	man	62	15	240	0	No	No	No	No	No	No	ISOLATED TBI	no	no	no	yes	Traffic	2.83027e+06	4.74884e+06	136550	3978	766736	0.205611	6924	18976.7	130061	14	95	1.56586e+06	629266
54	Geneva	man	53	15	120	0	No	No	No	No	No	No	ISOLATED TBI	yes	no	no	yes	Fall	3.90867e+06	2.29306e+06	79751.4	1735	540700	0.001	23893	18481.1	168018	6	50	1.21622e+06	712935
55	Geneva	man	75	15	75	1	Yes	No	No	No	Yes	Yes	ISOLATED TBI	yes	no	no	yes	Fall	1.87532e+07	589172	241010	5183	636835	0.118978	50868	40934.9	262658	15	129	2.26216e+07	922510
56	Geneva	man	56	15	360	0	No	No	No	No	No	No	ISOLATED TBI	no	no	no	yes	Fall	2.70503e+06	6.66799e+07	467939	1162	484408	0.063325	53239	8123	485667	278	973	1.25514e+06	419492
57	Geneva	man	57	15	360	0	No	No	No	No	No	No	ISOLATED TBI	yes	no	no	no	Fall	620147	3.03702e+07	260451	2101	364297	0.001	60319	18743.8	314902	66	454	988905	478913
58	Geneva	man	22	15	190	0	No	No	No	No	No	No	ISOLATED TBI	yes	no	no	yes	Fall	3.99076e+06	6.38923e+06	328160	1413	573375	0.149909	13960	12311.8	84414	10	62	3.31592e+06	1.01802e+06
59	Geneva	man	35	15	145	0	No	No	No	No	No	No	ISOLATED TBI	yes	no	yes	no	Assault	3.17783e+06	2.91574e+07	414430	4931	505118	0.114262	15262	28545.1	351033	19	160	1.46747e+06	599048
60	Geneva	man	19	15	50	0	No	No	No	No	No	No	ISOLATED TBI	yes	no	no	yes	Assault	274483	559190	267182	4607	487534	0.0151633	4509	27418.3	222403	22	146	2.06808e+06	760987
61	Geneva	man	66	15	75	1	No	No	No	No	No	Yes	POLITRAUMA	yes	no	no	yes	Traffic	1.69217e+06	2.39761e+07	481551	4234	506095	0.894622	54117	33143.5	125935	39	280	800452	777112
62	Geneva	woman	91	15	360	0	No	No	No	No	No	No	ISOLATED TBI	yes	no	no	no	Fall	3.93834e+06	82157.8	61117.3	5050	514304	0.190672	19520	11908.1	37083.1	8	76	6.50516e+06	972468
